# Supplementary material
Source: publisher site journal article supplement (https://www.dovepress.com/get_supplementary_file.php?f=421702.docx)
Supplement: Supplementary file 1 [file get_supplementary_file.php]

Supplementary 1

| mNGS | | | |
| --- | --- | --- | --- |
| Sex | Age | Sample type | Species |
| male | 64 | CSF | *Human alphaherpesvirus 1* |
| female | 43 | BALF | *Pneumocystis jirovecii* |
| male | 68 | BALF | *Acinetobacter baumannii,Enterococcus faecium,Human betaherpesvirus 6B* |
| female | 65 | BALF | *Burkholderia cepacia complex* |
| male | 68 | blood | *Human betaherpesvirus 6B* |
| male | 79 | CSF | *Human gammaherpesvirus 4 (Epstein-Barr virus)* |
| male | 73 | BALF | *Candida albicans* |
| male | 53 | CSF | *Balamuthia mandrillaris* |
| female | 72 | BALF | *Pneumocystis jirovecii* |
| female | 65 | blood | *Human betaherpesvirus 5 (cytomegalovirus)* |
| male | 64 | BALF | *Acinetobacter baumannii* |
| male | 46 | BALF | *Candida albicans,Ureaplasma urealyticum,Enterococcus faecalis* |
| male | 18 | blood | *Human gammaherpesvirus 4 (Epstein-Barr virus)* |
| male | 46 | blood | *Human alphaherpesvirus 2* |
| male | 57 | blood | *Escherichia coli* |
| male | 56 | BALF | *Acinetobacter baumannii* |
| male | 57 | ascitic fluid | *Escherichia coli* |

| Culture | | | |
| --- | --- | --- | --- |
| Sex | Age | Sample type | Species |
| male | 91 | blood | *Klebsiella pneumoniae* |
| male | 101 | blood | *Klebsiella pneumoniae* |
| male | 101 | blood | *Klebsiella pneumoniae* |
| male | 63 | blood | *Klebsiella pneumoniae* |
| male | 51 | blood | *Klebsiella pneumoniae* |
| female | 55 | blood | *Klebsiella pneumoniae* |
| female | 73 | blood | *Klebsiella pneumoniae* |
| female | 68 | blood | *Acinetobacter baumannii* |
| female | 82 | blood | *Acinetobacter baumannii* |
| male | 47 | blood | *Escherichia coli* |
| female | 73 | blood | *Pseudomonas aeruginosa* |
| female | 73 | blood | *Pseudomonas aeruginosa* |
| female | 35 | blood | *Staphylococcus aureus* |
| male | 32 | blood | *Enterococcus faecium* |
| female | 76 | blood | *Enterococcus faecium* |
| female | 53 | blood | *Staphylococcus epidermidis* |
| male | 63 | blood | *Staphylococcus epidermidis* |
| male | 74 | blood | *Klebsiella oxytoca* |
| male | 89 | blood | *Streptococcus constellatus* |
| female | 79 | blood | *Klebsiella aerogenes* |
| male | 89 | blood | *Candida norvegensis* |
| female | 81 | sputum | *Klebsiella pneumoniae* |
| female | 31 | sputum | *Klebsiella pneumoniae* |
| male | 79 | sputum | *Klebsiella pneumoniae* |
| male | 31 | sputum | *Klebsiella pneumoniae* |
| female | 70 | sputum | *Klebsiella pneumoniae* |
| male | 85 | sputum | *Klebsiella pneumoniae* |
| male | 55 | sputum | *Klebsiella pneumoniae* |
| male | 61 | sputum | *Acinetobacter baumannii* |
| male | 31 | sputum | *Acinetobacter baumannii* |
| male | 92 | sputum | *Acinetobacter baumannii* |
| female | 31 | sputum | *Acinetobacter baumannii* |
| male | 50 | sputum | *Acinetobacter baumannii* |
| male | 64 | sputum | *Acinetobacter baumannii* |
| female | 82 | sputum | *Acinetobacter baumannii* |
| male | 56 | sputum | *Acinetobacter baumannii* |
| male | 37 | sputum | *Acinetobacter baumannii* |
| female | 90 | sputum | *Acinetobacter baumannii* |
| male | 96 | sputum | *Acinetobacter baumannii* |
| male | 83 | sputum | *Acinetobacter baumannii* |
| male | 89 | sputum | *Acinetobacter baumannii* |
| male | 47 | sputum | *Escherichia coli* |
| male | 69 | sputum | *Escherichia coli* |
| female | 39 | sputum | *Escherichia coli* |
| male | 86 | sputum | *Pseudomonas aeruginosa* |
| male | 82 | sputum | *Pseudomonas aeruginosa* |
| male | 85 | sputum | *Pseudomonas aeruginosa* |
| male | 50 | sputum | *Pseudomonas aeruginosa* |
| male | 56 | sputum | *Pseudomonas aeruginosa* |
| male | 58 | sputum | *Pseudomonas aeruginosa* |
| male | 59 | sputum | *Staphylococcus aureus* |
| male | 20 | sputum | *Staphylococcus aureus* |
| male | 56 | sputum | *Staphylococcus aureus* |
| male | 65 | sputum | *Staphylococcus aureus* |
| female | 76 | sputum | *Staphylococcus aureus* |
| male | 51 | sputum | *Stenotrophomonas maltophilia* |
| male | 58 | sputum | *Stenotrophomonas maltophilia* |
| male | 73 | sputum | *Stenotrophomonas maltophilia* |
| female | 77 | sputum | *Klebsiella oxytoca* |
| male | 57 | sputum | *Klebsiella oxytoca* |
| male | 78 | sputum | *Acinetobacter nosocomialis* |
| male | 85 | sputum | *Klebsiella aerogenes* |
| male | 80 | sputum | *Haemophilus influenzae* |
| male | 57 | sputum | *Streptococcus pneumoniae* |
| male | 78 | sputum | *Citrobacter koseri* |
| male | 49 | sputum | *Acinetobacter junii* |
| female | 90 | sputum | *Burkholderia cepacia* |
| male | 64 | sputum | *Elizabethkingia anophelis* |
| female | 71 | sputum | *Acinetobacter baumannii* |
| male | 80 | BALF | *Klebsiella pneumoniae* |
| male | 79 | BALF | *Klebsiella pneumoniae* |
| female | 65 | BALF | *Klebsiella pneumoniae* |
| female | 54 | BALF | *Klebsiella pneumoniae* |
| male | 26 | BALF | *Acinetobacter baumannii* |
| female | 44 | BALF | *Acinetobacter baumannii* |
| male | 31 | BALF | *Acinetobacter baumannii* |
| male | 73 | BALF | *Acinetobacter baumannii* |
| female | 84 | BALF | *Acinetobacter baumannii* |
| female | 34 | BALF | *Acinetobacter baumannii* |
| female | 90 | BALF | *Acinetobacter baumannii* |
| male | 82 | BALF | *Pseudomonas aeruginosa* |
| male | 67 | BALF | *Pseudomonas aeruginosa* |
| male | 31 | BALF | *Staphylococcus aureus* |
| male | 51 | BALF | *Staphylococcus aureus* |
| male | 57 | BALF | *Klebsiella oxytoca* |
| female | 53 | BALF | *Acinetobacter nosocomialis* |
| male | 62 | BALF | *Enterobacter cloacae* |
| male | 47 | BALF | *Haemophilus influenzae* |
| female | 65 | BALF | *Burkholderia cepacia* |
| male | 89 | BALF | *Serratia liquefaciens* |
